# Supplementary material for: Substantially improved energy storage capability of ferroelectric thin films for application in high-temperature capacitors
Source: Royal Society of Chemistry journal article supplement (doi:10.1039/d0ta08335f), 2020-11-07
Supplement: d0ta08335f1.pdf [file d0ta08335f1.pdf]

## Supporting Information

### Substantially Improved Energy Storage Capability of Ferroelectric Thin Films for Application in High-temperature Capacitors

Zhongbin Pan<sup>a, b, 1\*</sup>, Jie Ding<sup>b, 1</sup>, Xu Hou<sup>e, 1</sup>, Songhan Shi<sup>b</sup>, Lingmin Yao<sup>d</sup>, Jinjun Liu<sup>b</sup>,  
Peng Li<sup>c</sup>, Jianwen Chen<sup>f</sup>, Jiwei Zhai<sup>g\*</sup>, and Hui Pan<sup>a\*</sup>

<sup>a</sup>Institute of Applied Physics and Materials Engineering, University of Macau, Macau SAR, China. Email: huipan@um.edu.mo (Hui Pan)

<sup>b</sup>School of Materials Science and Chemical Engineering, Ningbo University, Ningbo, Zhejiang 315211, China. Email: panzhongbin@163.com (Zhongbin Pan)

<sup>c</sup>School of Materials Science and Engineering, Liaocheng University, Liaocheng 252059, China.

<sup>d</sup>School of Physics and Electronic Engineering, Guangzhou University, Guangzhou, Guangdong 510006, China.

<sup>e</sup>Department of Engineering Mechanics, School of Aeronautics and Astronautics, Zhejiang University, Zheda Road 38, Hangzhou, Zhejiang 310027, China

<sup>f</sup>School of Electronic and Information Engineering, Foshan University, Foshan, 528000, China.

<sup>g</sup>School of Materials Science & Engineering, Tongji University, Shanghai, 201804 China. Email: apzhai@tong.edu.cn (Jiwei Zhai)

## Supporting Information 1

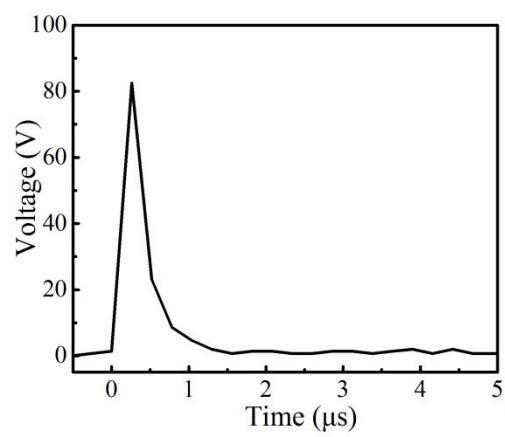

Figure S1 Charging/discharging curves of BNTZ-0.09BFO thin film.

## Supporting Information 2

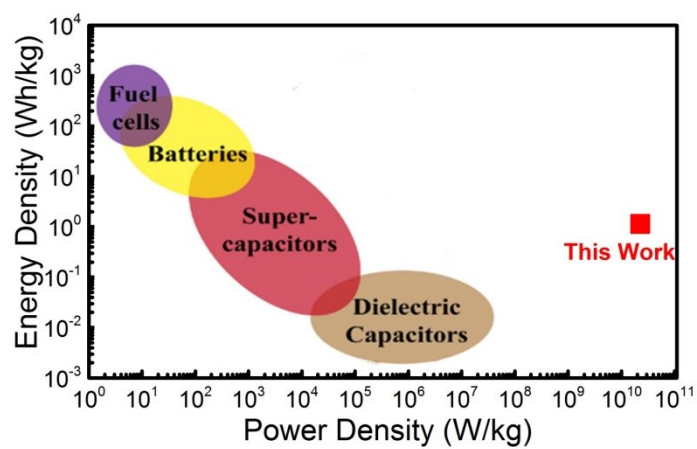

Figure S2 Comparison of energy density and power density for the BNTZ-0.09BFO thin film and other capacitors.

### Supporting Information 3

Table S1 the average grain sizes BNTZ-xBFO thin films.

| Samples  | D (nm)    | $\lambda$ | $\theta$   | $\beta$         |
|----------|-----------|-----------|------------|-----------------|
| x = 0.00 | 30.5±0.5  | 0.145     | 16.5±0.07  | 0.00441±0.00002 |
| x= 0.03  | 25.98±0.4 | 0.145     | 15.14±0.05 | 0.00518±0.00003 |
| x = 0.06 | 22.1±0.3  | 0.145     | 16.37±0.04 | 0.00609±0.00001 |
| x = 0.09 | 19.3±0. 5 | 0.145     | 16.33±0.06 | 0.00696±0.00001 |
| x = 0.12 | 17.2±0.5  | 0.145     | 16.24±0.03 | 0.00781±0.00002 |
